# Supplementary material
Source: Springer Nature journal article supplement (https://www.springermedizin.de/resource/supplementary/13049_2013_639_MOESM1_ESM.pdf/9666916)

Identification

1314 articles  
identified through  
database searching

Screening

1276 records after duplicates removed

Eligibility

46 articles screened

8 articles excluded  
n = 3 different setting than ED  
n = 2 no relevance to  
performance measurement  
n = 3 clinical measures only

Included

38 articles read in full

24 full-text articles excluded  
n = 20 not pertinent  
n = 2 investigated evidence  
behind measures  
n = 1 investigated usability in  
measures  
n = 1 criticism towards  
measures

14 articles included  
in further analysis

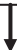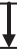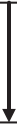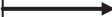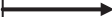

Supplement: MOESM1 [file 9666916]
